# Supplementary material
Source: PubMed Central journal article supplement (PMC4338558)
Supplement: NIHMS61359-supplement-3.pdf [file NIHMS61359-supplement-3.pdf]

**Supplementary Table 1.** Primers used in GATA-3 ChIP.

|                       |                             |
|-----------------------|-----------------------------|
| Mm Gpr15 upstream F   | GTTACAGATAAGGCGACTCACTTTAGC |
| Mm Gpr15 upstream R   | CTCAGACTCATATTCTCACCACACG   |
| Mm Gpr15 downstream F | GAGTAGAGGAGTGGGGAGTTTC      |
| Mm Gpr15 downstream R | AAGTGTGACATGCTGACTGATC      |
| Mm Gpr15 control F    | TGGAATACACTAGCACCCTTCTC     |
| Mm Gpr15 control R    | AGATGATGTGGGATGCTCTGTATC    |
| Mm Il4 CNS2 F         | ATCACGTCGTCTTACCCAAA        |
| Mm Il4 CNS2 R         | TGTGGGAGAGCGTCTGATCTG       |
| Hs GPR15 upstream F   | TCACCAACCACACAACCGTATTTTC   |
| Hs GPR15 upstream R   | AACAGCAGAGTAAGAAGCAGAAGTAG  |
| Hs GPR15 downstream F | GTGACTTGGTGACTGATCTCATTACTG |
| Hs GPR15 downstream R | ACTTGTCTTCTTGGGTGAAATAACTTC |
| Hs GPR15 control F    | TGTACCCCGATGCAGATTATCATT    |
| Hs GPR15 control R    | GAGCAGCCTGTCTCCCTATATTAC    |
| Hs IL4 CNS2 F         | CGTGTTTGGGTGAGACAATC        |
| Hs IL4 CNS2 R         | ATCTTGGGGCTTCCTGTGACC       |

**Supplementary Table 2.** GEO accession numbers for previously published ChIP-seq datasets used in this study

|                                         |                                 |                                     |
|-----------------------------------------|---------------------------------|-------------------------------------|
| Human T <sub>H</sub> 2 GATA-3           | GSM776559 and GSM776556 (input) | Kanere, A. <i>et al.</i> (2012)     |
| Mouse T <sub>H</sub> 2 Gata-3           | GSM523226                       | Wei, G. <i>et al.</i> (2011)        |
| Mouse T <sub>H</sub> 2 Gata-3 replicate | GSM742023                       | Wei, G. <i>et al.</i> (2011)        |
| Mouse T <sub>H</sub> 17 Gata-3          | GSM523228                       | Wei, G. <i>et al.</i> (2011)        |
| Mouse nT <sub>reg</sub> Gata-3          | GSM523230                       | WWei, G. <i>et al.</i> (2011)       |
| Mouse Foxp3                             | GSM999179 and GSM999181 (input) | Samstein, R.M. <i>et al.</i> (2012) |
| Human Foxp3 donor1 rep1                 | SRR192542                       | Birzele, F. <i>et al.</i> (2011)    |
| Human Foxp3 donor1 rep 2                | SRR192543                       | Birzele, F. <i>et al.</i> (2011)    |
| Human Foxp3 donor2 rep1                 | SRR192544                       | Birzele, F. <i>et al.</i> (2011)    |
| Human Foxp3 donor2 rep2                 | SRR192545                       | Birzele, F. <i>et al.</i> (2011)    |
| Mouse Th1 H3K4me3                       | GSM361999                       | Wei, G. <i>et al.</i> (2009)        |
| Mouse Th2 H3K4me2                       | GSM362001                       | Wei, G. <i>et al.</i> (2009)        |
